# Supplementary material
Source: Research Square preprint supplement (doi:10.21203/rs.3.rs-9445960/v1)
Supplement: Supplementary file 1 [file c1090a8427c495147f8ff7fd.pdf]

## Supplementary Information

### **Single tooth reveals multiple forensic insights for human identification**

**—applicability to remains with advanced postmortem changes—**

Sayaka Yamada<sup>1\*</sup>, Hisako Saitoh<sup>1\*</sup>, Kanju Saka<sup>2</sup>, Saki Minegishi<sup>1</sup>, Toru Moriya<sup>3</sup>, Mirei Takeyama<sup>3</sup>, Hajime Utsuno<sup>1</sup>, Namiki Shuuji<sup>1</sup>, Hanafi Muhammad Garry Syahrizal<sup>1</sup>, Nanami Aoki<sup>1</sup>, Yohsuke Makino<sup>2</sup>, Hirotarō Iwase<sup>4</sup>, Fuyuki Tokanai<sup>3</sup>, Koichi Sakurada<sup>1</sup>

<sup>1</sup>Department of Forensic Dentistry, Graduate School of Medical and Dental Sciences, Institute of Science Tokyo, 1-5-45 Yushima, Bunkyo-ku, Tokyo 113-8510, Japan

<sup>2</sup>Department of Forensic Medicine, Graduate School of Medicine, The University of Tokyo, 7-3-1 Hongo, Bunkyo-ku, Tokyo 113-0033, Japan

<sup>3</sup>Center for Accelerator Mass Spectrometry, Yamagata University, 19-5 Kanakame, Kaminoyama, Yamagata 999-3101, Japan

<sup>4</sup>Department of Legal Medicine, Graduate School of Medicine, Chiba University, 1-8-1 Inohana, Chuo-ku, Chiba 260-8670, Japan

\*Corresponding author. Email: [yamada.sayaka@tmd.ac.jp](mailto:yamada.sayaka@tmd.ac.jp), [saitoh.hisako@tmd.ac.jp](mailto:saitoh.hisako@tmd.ac.jp)

### **Contents**

Supplementary Figs. S1–S3

Supplementary Tables S1–S3

Supplementary Fig. S1 Serial longitudinal sections approximately 1 mm thick were prepared according to the size of each tooth. Enamel was removed from each section.

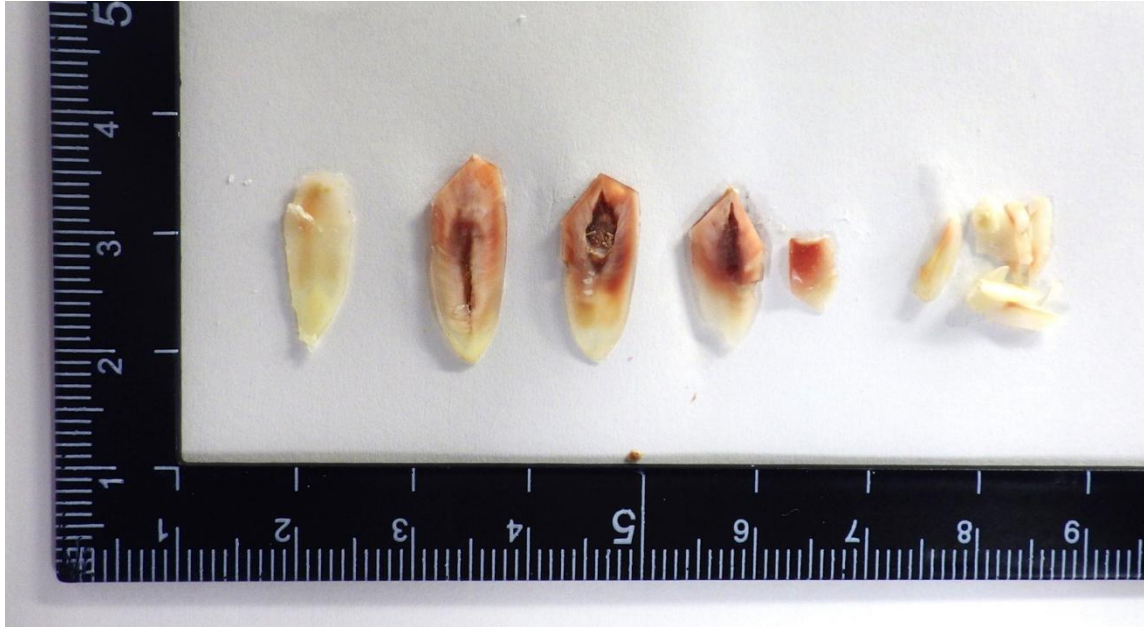

Supplementary Fig S2 Calibration curve used for amino acid racemization analysis. We measured the rate of racemization in the mandibular first premolars of individuals aged 25 to 72. Age and racemization rate showed a strong positive correlation ( $r = 0.95$ ).

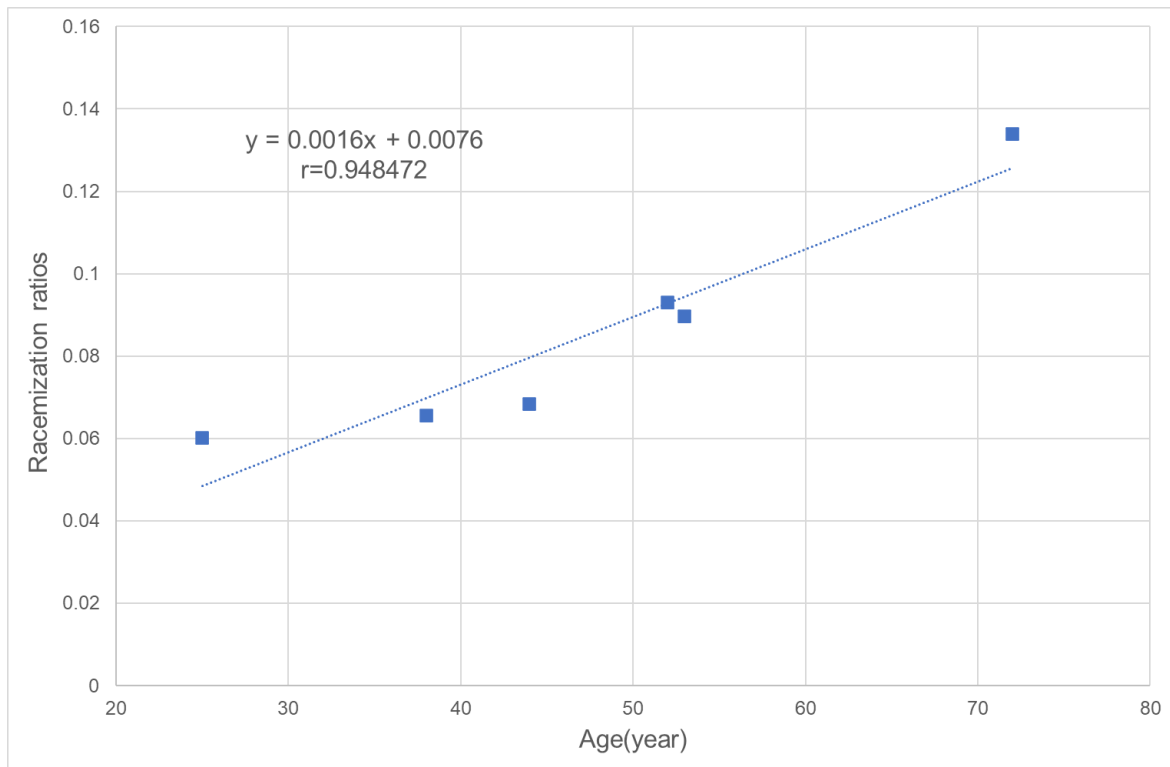

Supplementary Fig. S3 Example of STR typing and Y-STR results. Partial analysis results for sample no. 5 are shown below. a: STR typing. b: Y-STR typing.

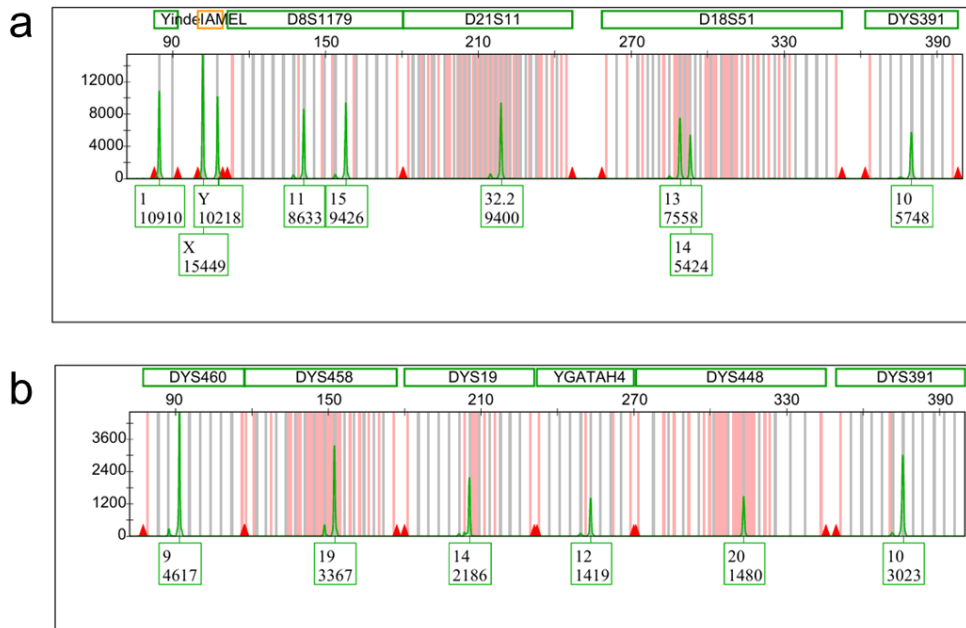

Supplementary Table S1 Comparison of Final estimated year of birth (YOB) and Actual YOB with absolute error.

| <b>Case no.</b> | <b>Final estimated YOB</b> | <b>Actual YOB</b> | <b>Absolute error</b> |
|-----------------|----------------------------|-------------------|-----------------------|
| 1               | 1955.33                    | 1957.74           | 2.41                  |
| 2               | 1963.57                    | 1959.45           | 4.12                  |
| 3               | 1950.42                    | 1952.67           | 2.25                  |
| 4               | 1966.48                    | 1960.80           | 5.68                  |
| 5               | 1954.74                    | 1956.57           | 1.83                  |
| 6               | 1953.47                    | 1954.20           | 0.73                  |
| 7               | 1971.06                    | 1966.95           | 4.11                  |
| 8               | ND                         | 1952.32           | ND                    |
| 9               | 2000.00                    | 1990.70           | 9.30                  |
| 10              | 1975.64                    | 1971.04           | 4.60                  |
| 11              | 1991.83                    | 1986.51           | 5.32                  |
| 12              | 1934.66                    | 1948.59           | 13.93                 |
| 13              | 1957.18                    | 1967.12           | 9.94                  |
| 14              | 1945.89                    | 1944.00           | 1.89                  |
| 15              | 1976.07                    | 1972              | 4.04                  |

The estimated YOB derived from  $^{14}\text{C}$  analysis and AAR analysis is presented as the final estimated YOB , and the difference between the final estimated YOB and the actual YOB is presented as the margin of error.

For no. 15, because the date of birth of the leading candidate for the identity was unknown, actual YOB was calculated by assuming 1972 based on their age at the time (41 years old).

Supplementary Table S2 Results of mtDNA HV1 region analysis.

| <b>Case no.</b> | <b>Range</b>  | <b>Haplotype</b>                          |
|-----------------|---------------|-------------------------------------------|
| 1               | 16,086–16,195 | 16111T 16189C                             |
| 2               | 16,086–16,228 | 16189C 16194G 16195C 16223T 16223T 16227G |
| 3               | 16,086–16,254 | 16223T                                    |
| 4               | Not performed | Not performed                             |
| 5               | Not detected  | Not detected                              |
| 6               | 16,086–16,255 | 16209C 16223T                             |
| 7               | 16,086–16,255 | 16129A 16223T                             |
| 8               | 16,086–16,254 | 16129A 16189Y 16223T                      |
| 9               | 16,086–16,255 | 16223T                                    |
| 10              | 16,086–16,254 | 16187T 16223T                             |
| 11              | 16,086–16,255 | 16209C 16223T                             |
| 12              | 16,086–16,201 | 16111T 16189C                             |
| 13              | 16,086–16,193 | 16111T 16189C                             |
| 14              | 16,086–16,254 | 16209C 16223T                             |
| 15              | 16,086–16,193 | 16182C 16183C 16189C                      |

Base pair ranges and haplotypes of the mtDNA HV1 region are shown for each sample.

Supplementary Table S3 Results of mtDNA HV2 region analysis.

| <b>Case no.</b> | <b>Range</b>  | <b>Haplotype</b>                     |
|-----------------|---------------|--------------------------------------|
| 1               | Not detected  | Not detected                         |
| 2               | 97–340        | 263G 315.1C                          |
| 3               | 109–367       | 263G 315.1C                          |
| 4               | Not performed | Not performed                        |
| 5               | 96–315        | 103A 152C 199C 203A 204C 263G 309.1C |
| 6               | Not detected  | Not detected                         |
| 7               | 96–360        | 152C 263G 315.1C                     |
| 8               | 97–318        | 263G 309.1C 315.1C                   |
| 9               | 97–320        | 263G 315.1C                          |
| 10              | Not detected  | Not detected                         |
| 11              | 295–380       | 315.1C                               |
| 12              | 293–370       | 315.1C                               |
| 13              | 287–340       | 315.1C                               |
| 14              | Not detected  | Not detected                         |
| 15              | 111–315       | 150T 263G 309.2C                     |

Sequence ranges and haplotypes of the mtDNA HV2 region are shown for each sample.
